# Supplementary material
Source: Springer Nature journal article supplement (https://www.springermedizin.de/resource/supplementary/12916_2012_662_MOESM11_ESM.pdf/9597936)

Testis

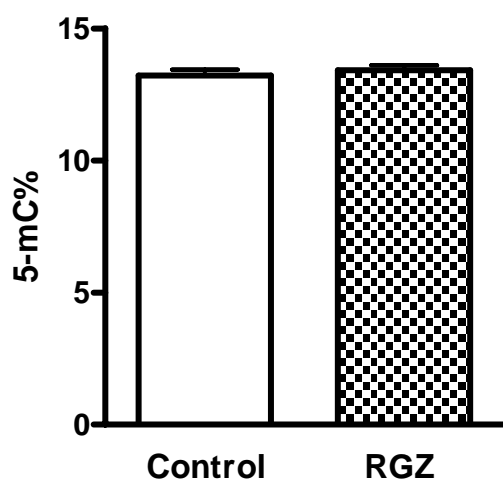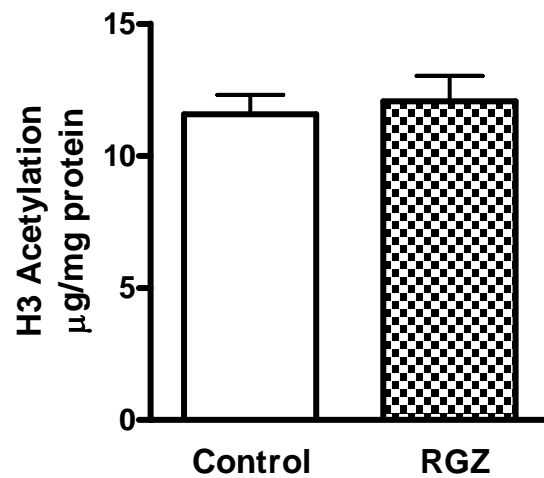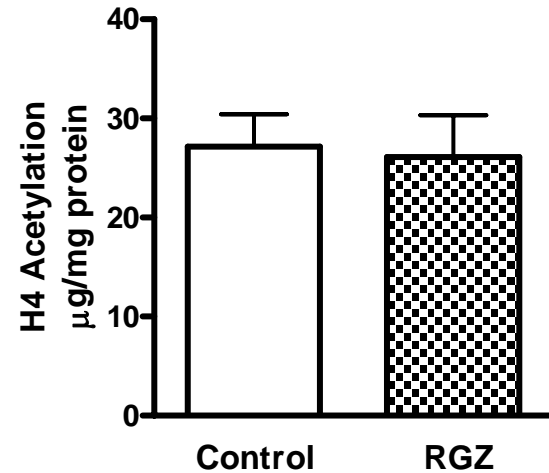

Ovary

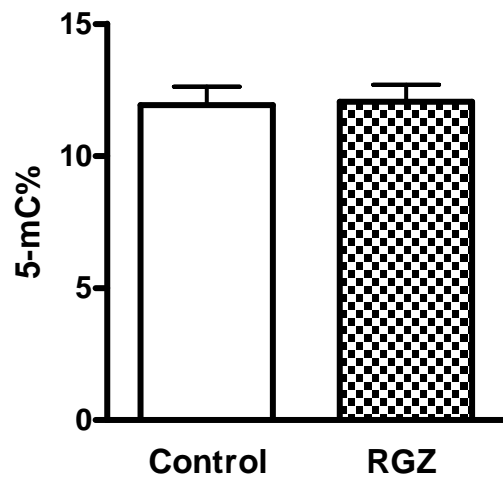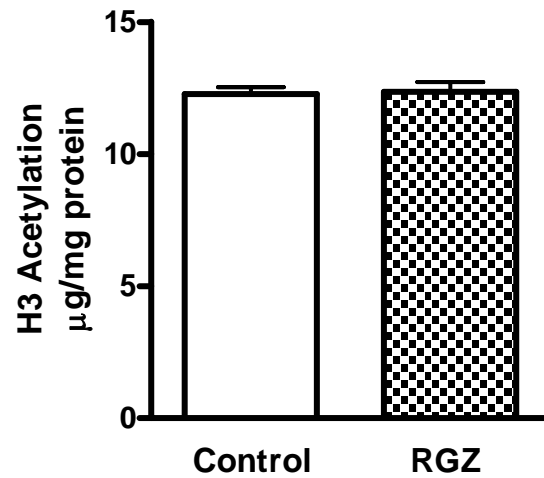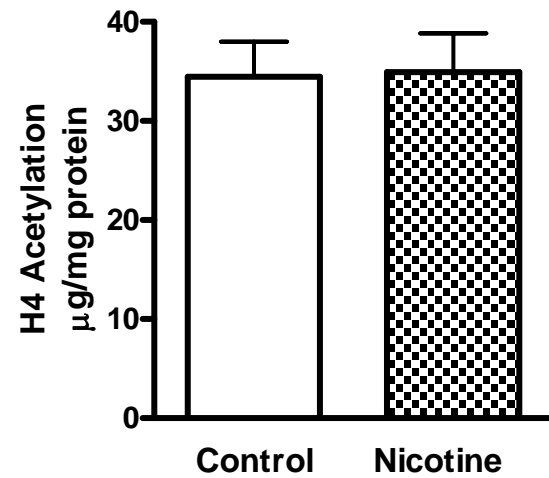

Supplement: MOESM11 [file 9597936]
